# Supplementary material
Source: PubMed Central journal article supplement (PMC2816187)

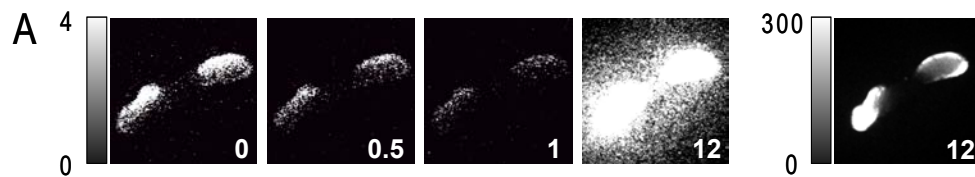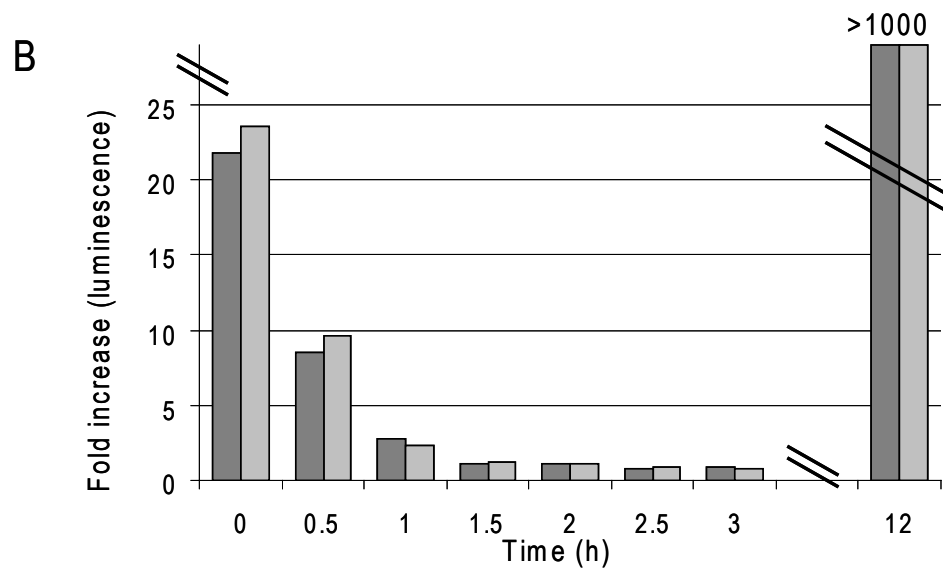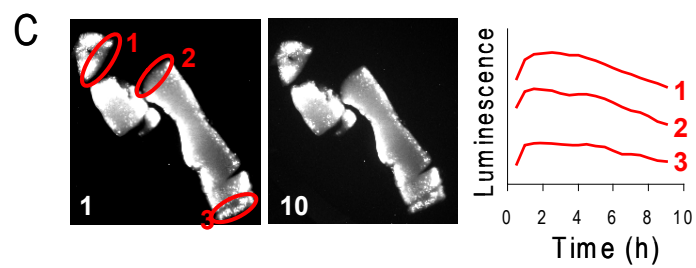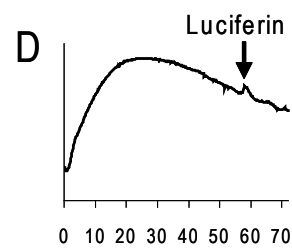

Supplement: supp_123_3_424__1.pdf [file supp_123_3_424__1.pdf]

**A**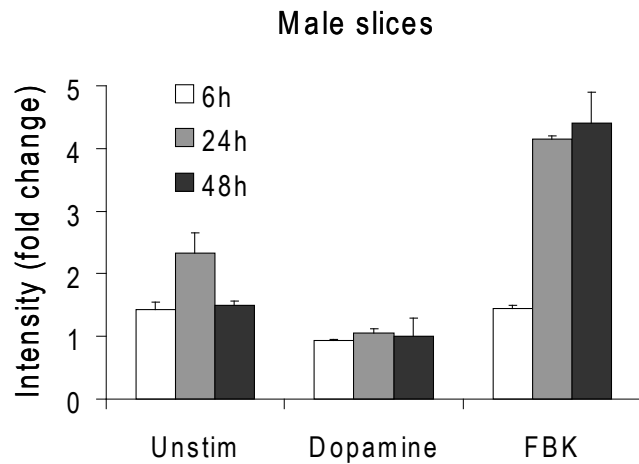**B**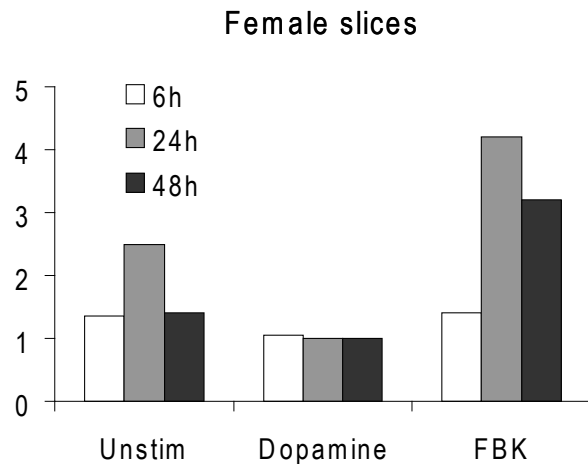

Supplement: supp_123_3_424__2.pdf [file supp_123_3_424__2.pdf]

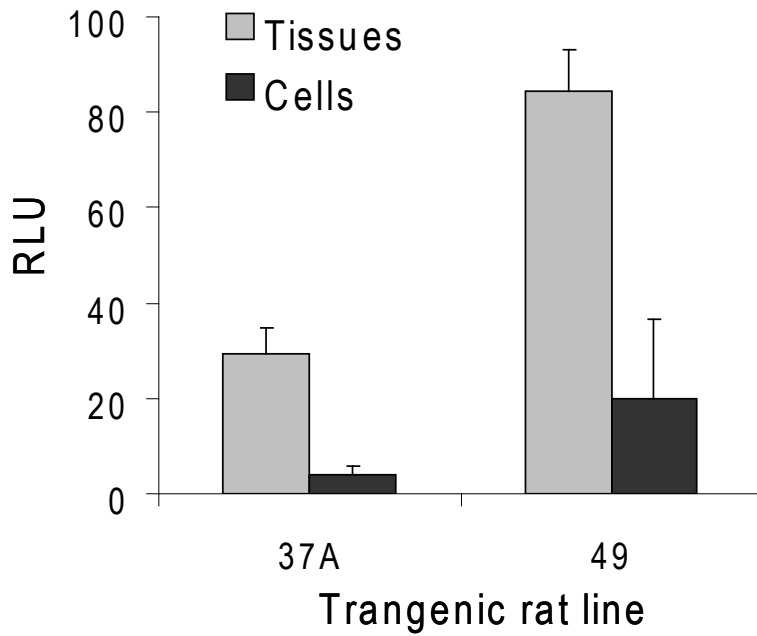

Supplement: supp_123_3_424__3.pdf [file supp_123_3_424__3.pdf]
